# Supplementary material for: Specific Isolation of Clostridium botulinum Group I Cells by Phage Lysin Cell Wall Binding Domain with the Aid of S-Layer Disruption
Source: MDPI journal article supplement (doi:10.3390/ijms23158391), 2022-07-29
Supplement: s1 [file s1]

## *Supplementary Material*

**Table S1.** Bacterial strains.

| Bacterial strain or plasmid                  | Relevant characteristics                                                                                                                                    | Reference or source <sup>a</sup> |
|----------------------------------------------|-------------------------------------------------------------------------------------------------------------------------------------------------------------|----------------------------------|
| <b><i>Clostridium botulinum</i></b>          |                                                                                                                                                             |                                  |
| ATCC3502                                     | Group I, produces type A botulinum neurotoxin (BoNT/A)                                                                                                      | (54)                             |
| NCTC2916                                     | Group I, produces BoNT/A, carries a silent gene for BoNT/B                                                                                                  | (55)                             |
| 62A                                          | Group I, produces BoNT/A                                                                                                                                    | (55)                             |
| ATCC19397                                    | Group I, produces BoNT/A                                                                                                                                    | (56)                             |
| 133-4803                                     | Group I, produces BoNT/B                                                                                                                                    | (57)                             |
| 213B                                         | Group I, produces BoNT/B                                                                                                                                    | (57)                             |
| F Langeland                                  | Group I, produces BoNT/F                                                                                                                                    | (55)                             |
| Eklund 2B                                    | Group II, produces BoNT/B                                                                                                                                   | (55)                             |
| CB11/1-1                                     | Group II, produces BoNT/E                                                                                                                                   | (58)                             |
| K126                                         | Group II, produces BoNT/E                                                                                                                                   | (58)                             |
| Eklund 202F                                  | Group II, produces BoNT/F                                                                                                                                   | (55)                             |
| BKT2873                                      | Group III, produces BoNT/CD                                                                                                                                 | (59)                             |
| <b>Other species</b>                         |                                                                                                                                                             |                                  |
| <i>Clostridium sporogenes</i> NINF45         | Nontoxigenic, closely related to <i>C. botulinum</i> Group I                                                                                                | (31)                             |
| <i>Clostridium baratii</i> CCUG24033         | Nontoxigenic, Also called <i>C. botulinum</i> Group V, type strain                                                                                          | (31)                             |
| <i>Clostridium butyricum</i> BL86/13         | Also called <i>C. botulinum</i> Group VI, produces BoNT/E                                                                                                   | DFHEH/QI                         |
| <i>Clostridium perfringens</i> ATCC13124     | Gas gangrene isolate, produces $\alpha$ -toxin                                                                                                              | (60)                             |
| <i>Bacillus cereus</i> ATCC14579             | <i>B. cereus</i> type strain                                                                                                                                | ATCC                             |
| <i>Bacillus subtilis</i> 1012M15             | Derivative strain from <i>B. subtilis</i> 168                                                                                                               | (12)                             |
| <i>Listeria monocytogenes</i> EGD-e          | Serotype 1/2a, causes listeriosis                                                                                                                           | (61)                             |
| <i>Staphylococcus aureus</i> ATCC12600       | <i>S. aureus</i> type strain                                                                                                                                | (62)                             |
| <i>Escherichia coli</i> 5 alpha              | Derivative strain of <i>E. coli</i> DH5 $\alpha$                                                                                                            | NEB                              |
| <i>Escherichia coli</i> Rosetta 2(DE3) pLysS | F <sup>-</sup> <i>ompT hsdS<sub>B</sub>(r<sub>B</sub><sup>-</sup> m<sub>B</sub><sup>-</sup>) gal dcm</i> (DE3) pLysSpRARE2 <sup>3</sup> (Cam <sup>R</sup> ) | Merck                            |

<sup>a</sup> DFHEH, Department of Food Hygiene and Environmental Health, Faculty of Veterinary Medicine, University of Helsinki, Finland. QI, Quadram Institute, United Kingdom. ATCC, American Type Culture Collection.

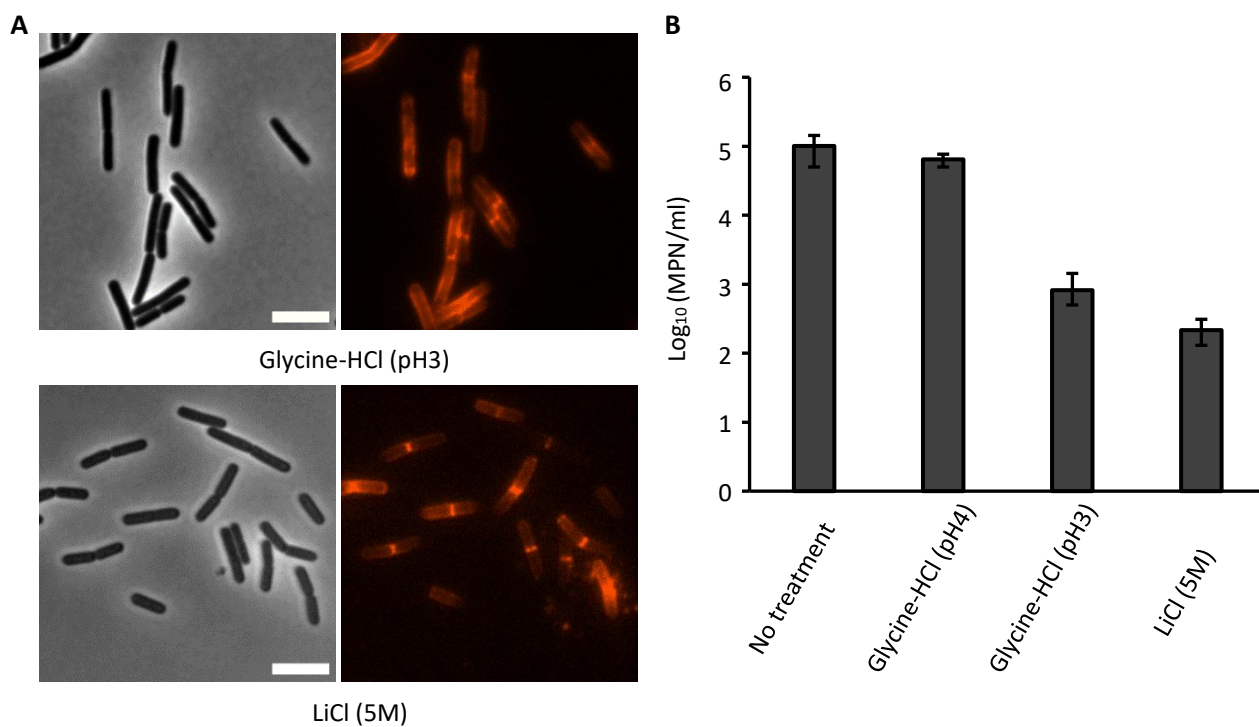

**Figure S1.** Treatment of *C. botulinum* ATCC3502 vegetative cells with glycine-HCl (pH3) and LiCl. (A) Representative fluorescence images showing the binding of mCherry-CBD to *C. botulinum* ATCC3502 cells after treated with 0.2M glycine-HCl (pH3) and 5M LiCl. Bars, 5  $\mu$ m. (B) Most probable number (MPN) enumeration of equal fractions of *C. botulinum* ATCC3502 vegetative cells that were either no treatment or treated with 0.2 M glycine-HCl (pH4), glycine-HCl (pH3) or 5M LiCl for 1 min. Results are presented as means of three replicates  $\pm$  standard deviations.

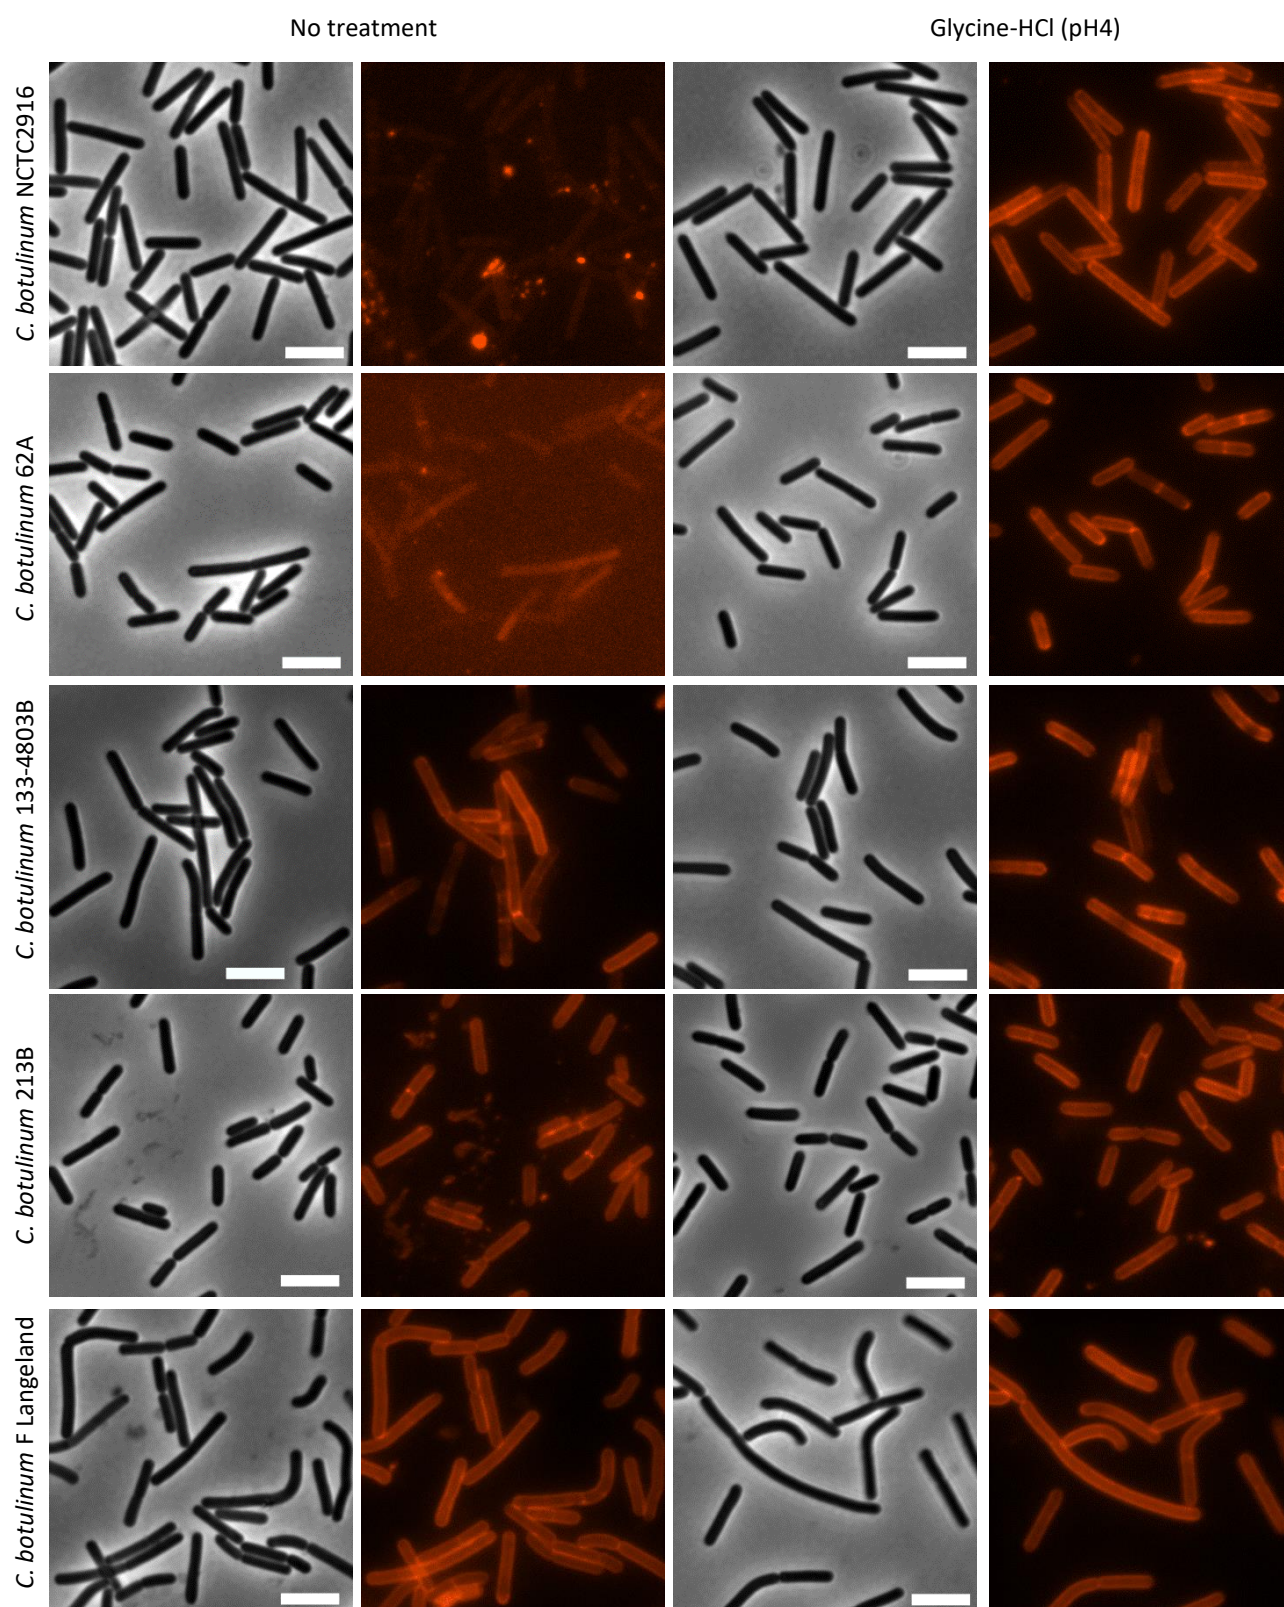



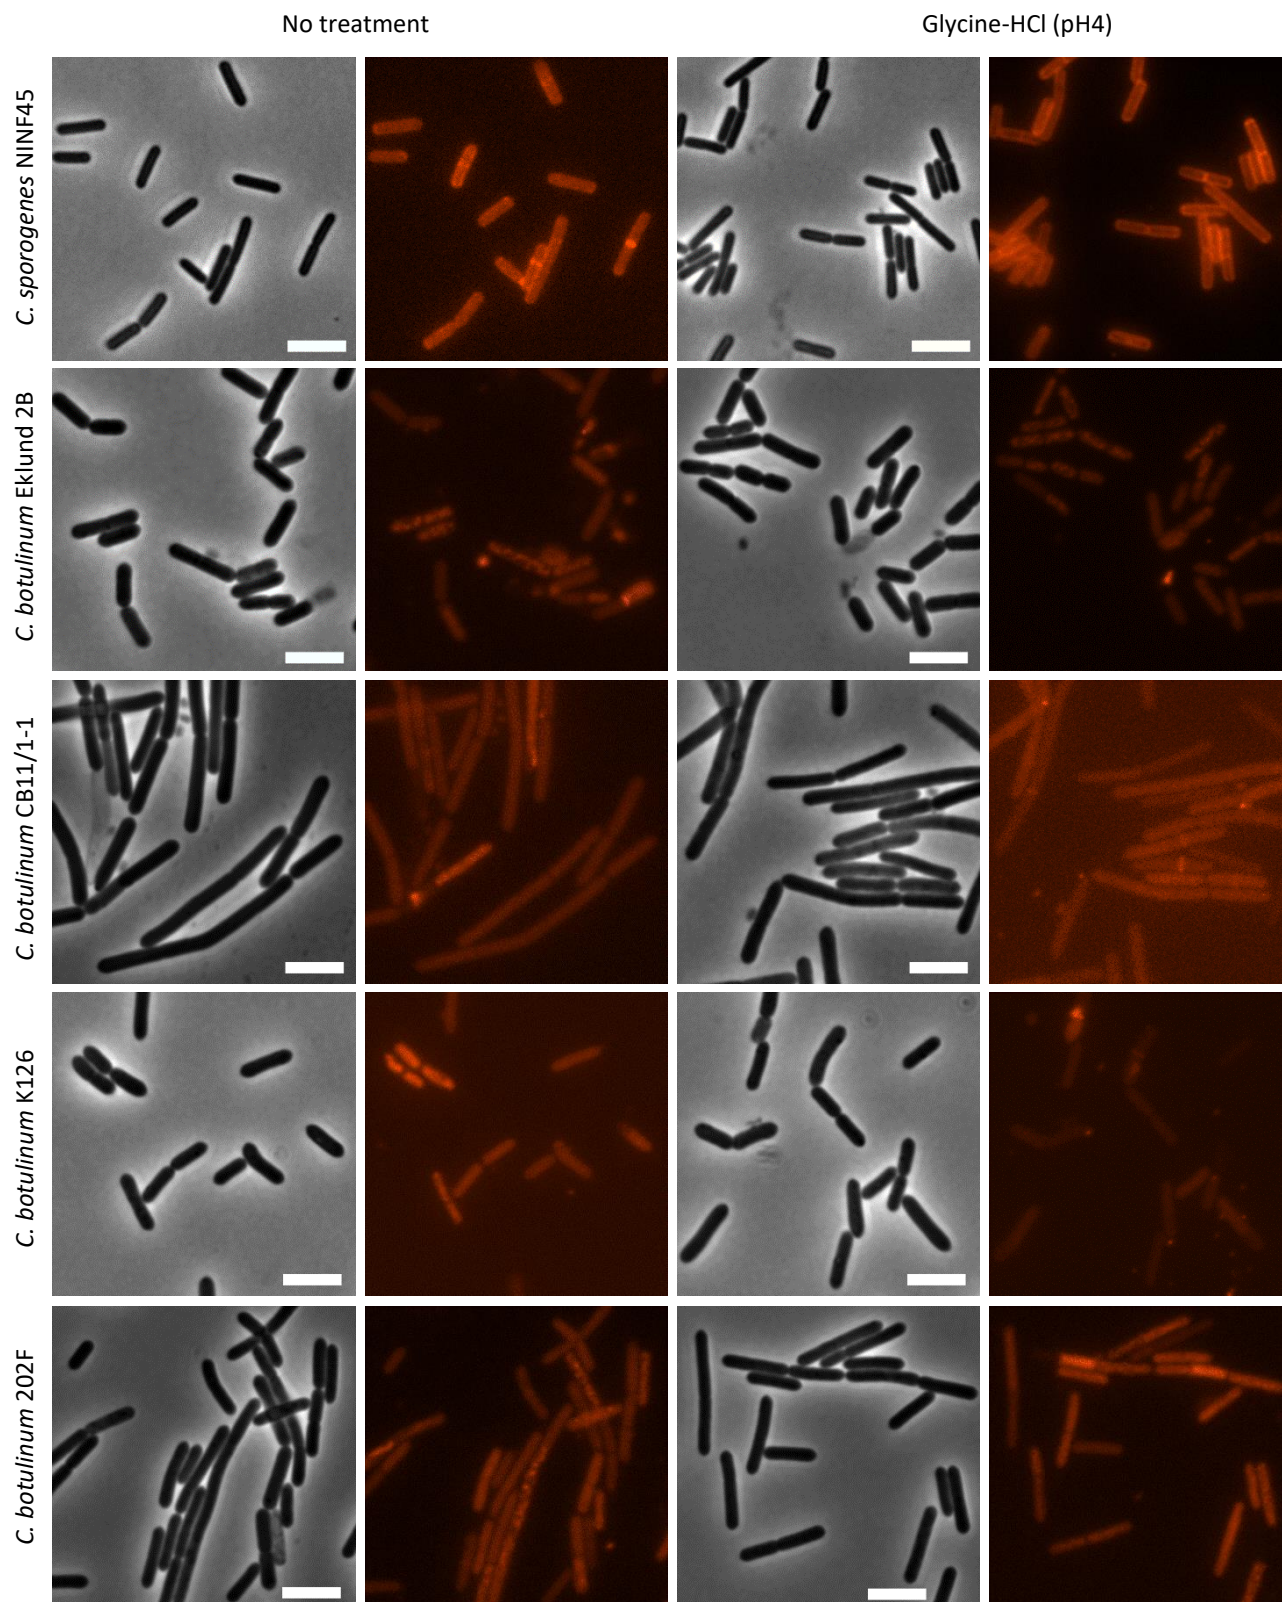

Figure S2 (continued)



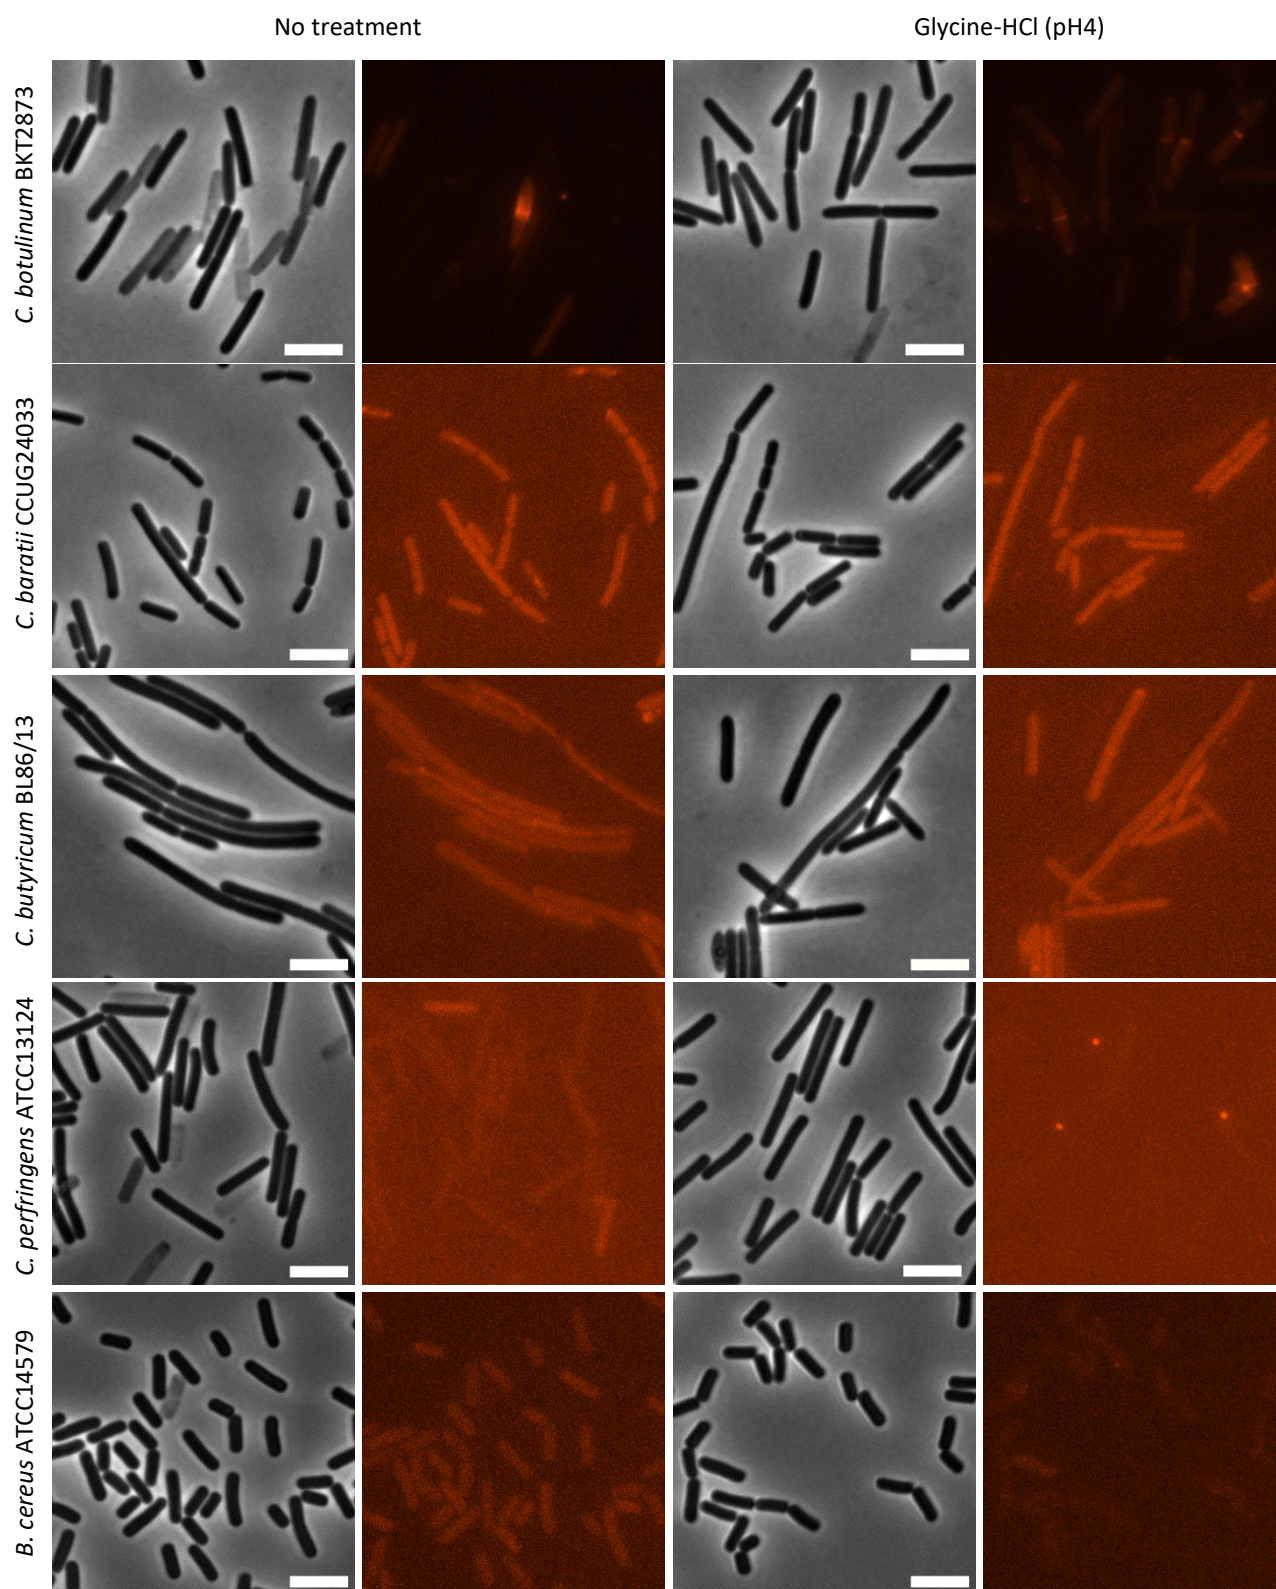

Figure S2 (continued)



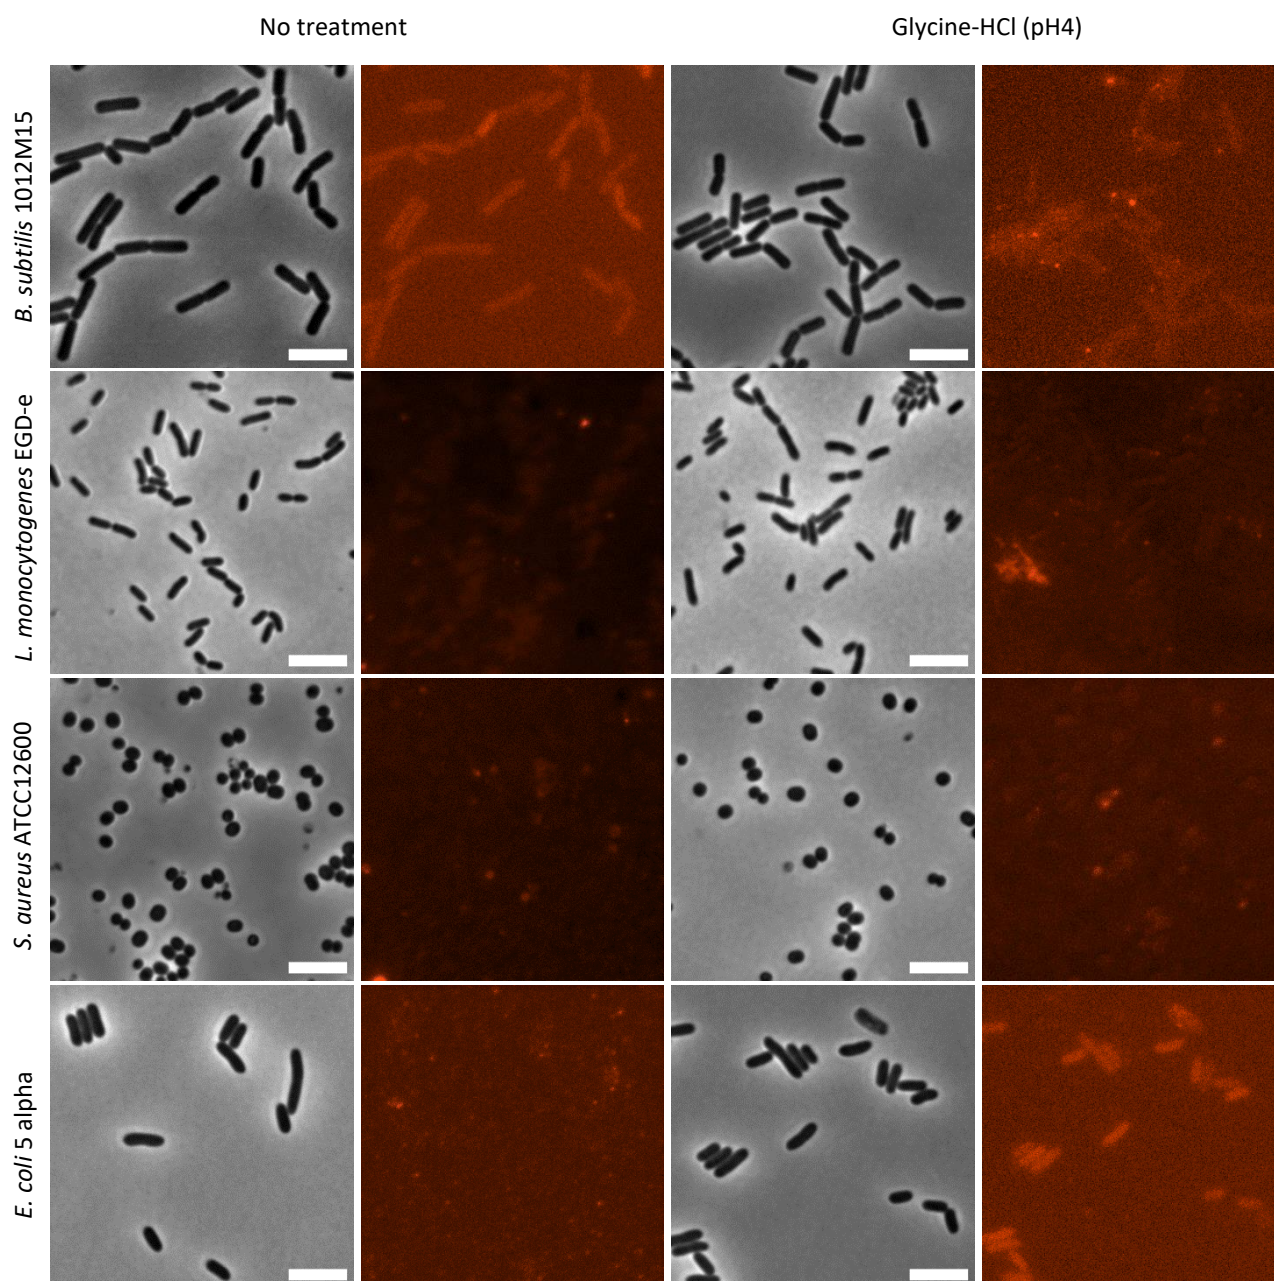

**Figure S2.** Representative fluorescence images of bacterial vegetative cells after incubation with mCherry-CBD. Before that, cells were either no treatment or treated with 0.2 M Glycine-HCl (pH 4) for 1 min. Bars, 5  $\mu$ m.

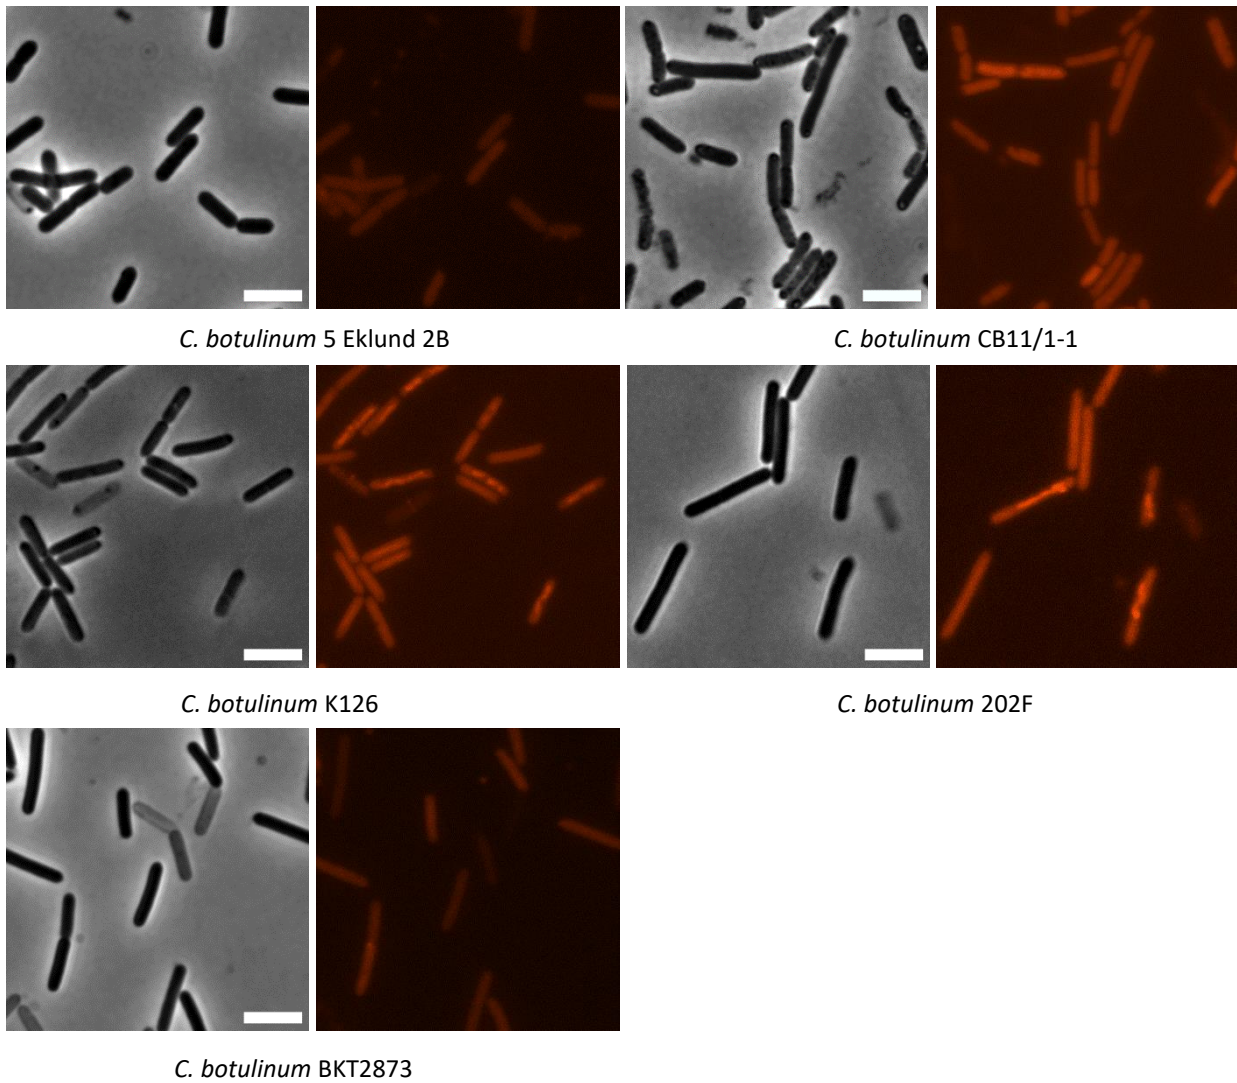

**Figure S3.** Representative images of *C. botulinum* Group II and Group III vegetative cells showing autofluorescence when viewed with a Texas Red filter.



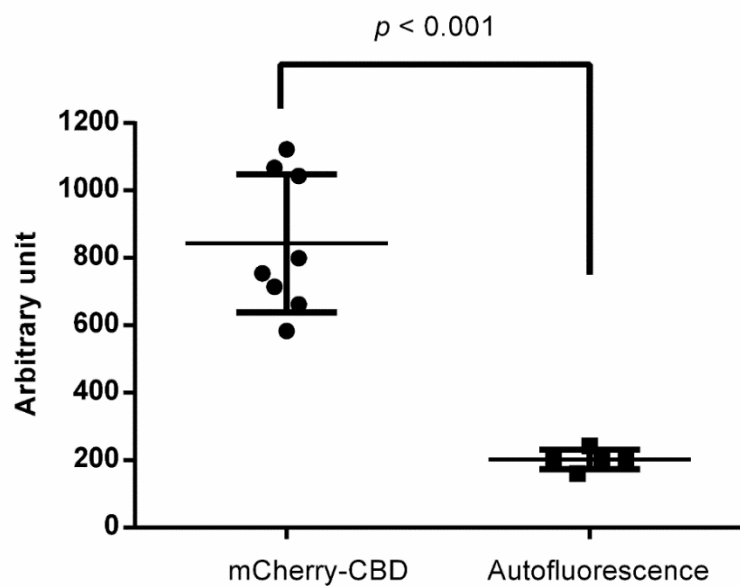

**Figure S4.** Comparison of fluorescence intensity of mCherry-CBD-labeled cells and autofluorescent cells. Fluorescence intensity of mCherry-CBD was measured from seven *C. botulinum* Group I strains and *C. sporogenes* NINF45. Autofluorescence intensity was measured from five *C. botulinum* Group II and Group III strains. Student's *t*-test was used for statistical analysis.

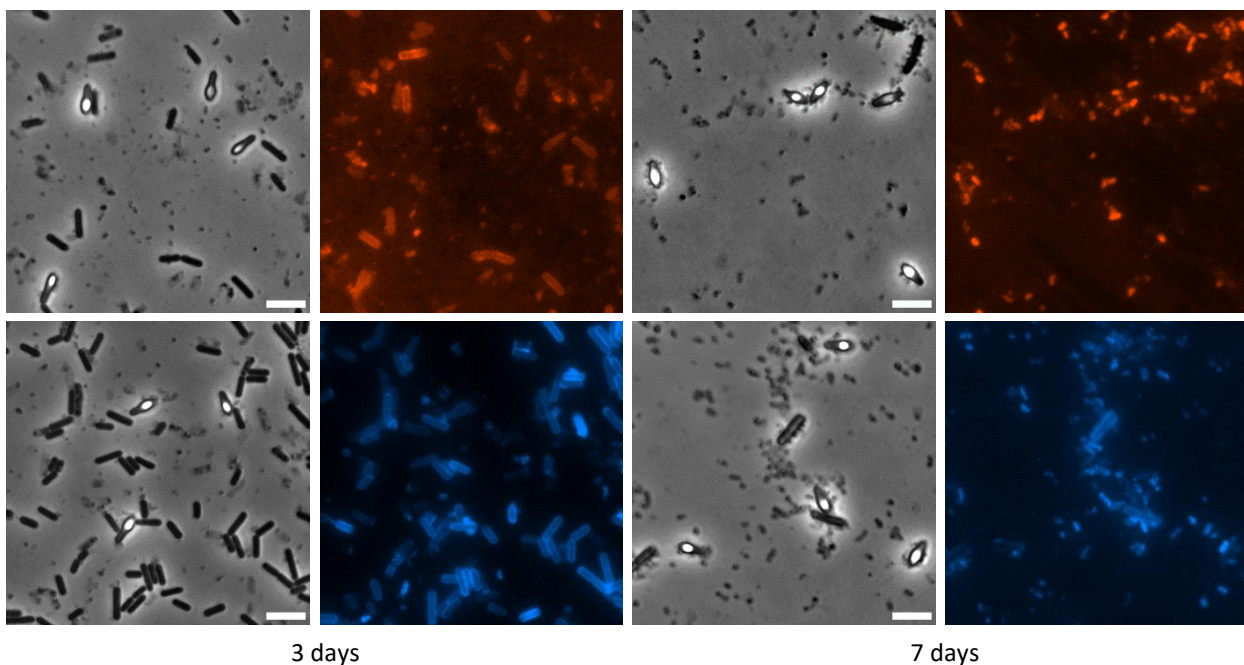

**Figure S5.** Representative fluorescence images of *C. botulinum* ATCC19397 cells cultured for 3 and 7 days after incubation with mCherry-CBD and mTagBFP-CBD. Bars, 5  $\mu$ m.



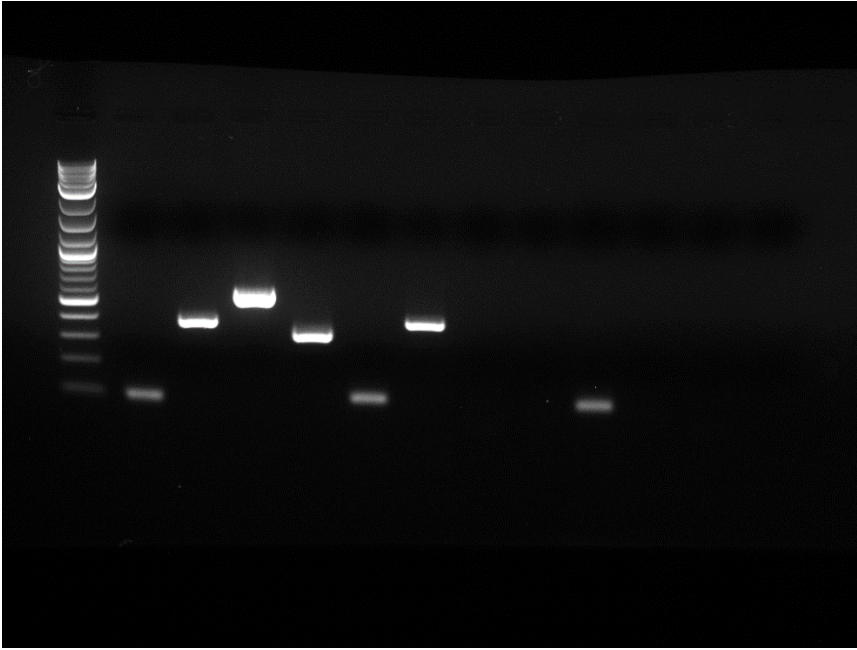

**Figure S6.** Original gel image used to prepare Figure 3C.

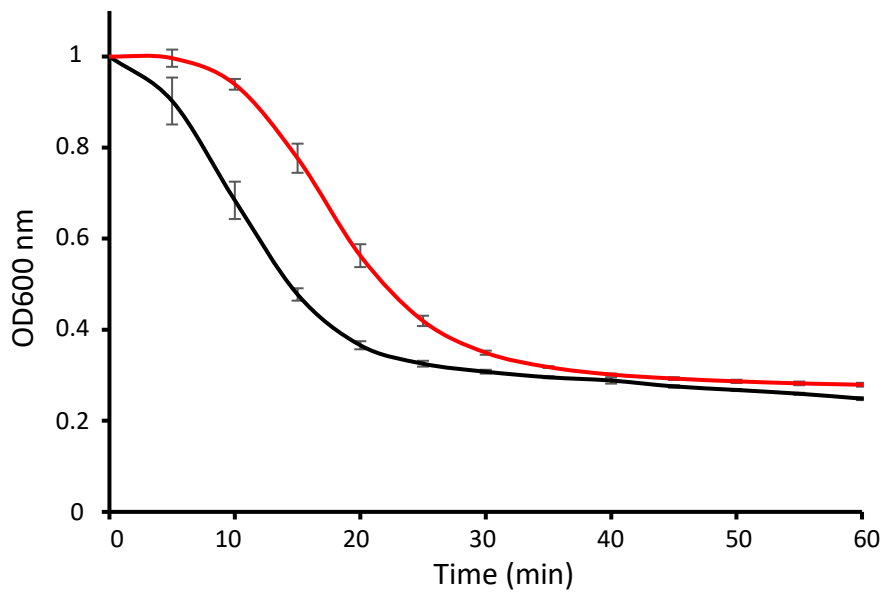

**Figure S7.** Turbidity reduction assay by measuring OD<sub>600</sub> of vegetative cells of *C. botulinum* Group I ATCC3502 (red line) and ATCC19397 (black line) over 60 min after addition of 5  $\mu$ M of lysin CBO1751. All OD<sub>600</sub> values were normalized to an initial OD<sub>600</sub> of 1. Data are presented as means of three replicates  $\pm$  standard deviations.
